# Supplementary material for: Transcriptome sequencing and phylogenomic resolution within Spalacidae (Rodentia)
Source: PubMed Central journal article supplement (PMC3898070; doi:10.1186/1471-2164-15-32), 2014-01-17

# WEGO output

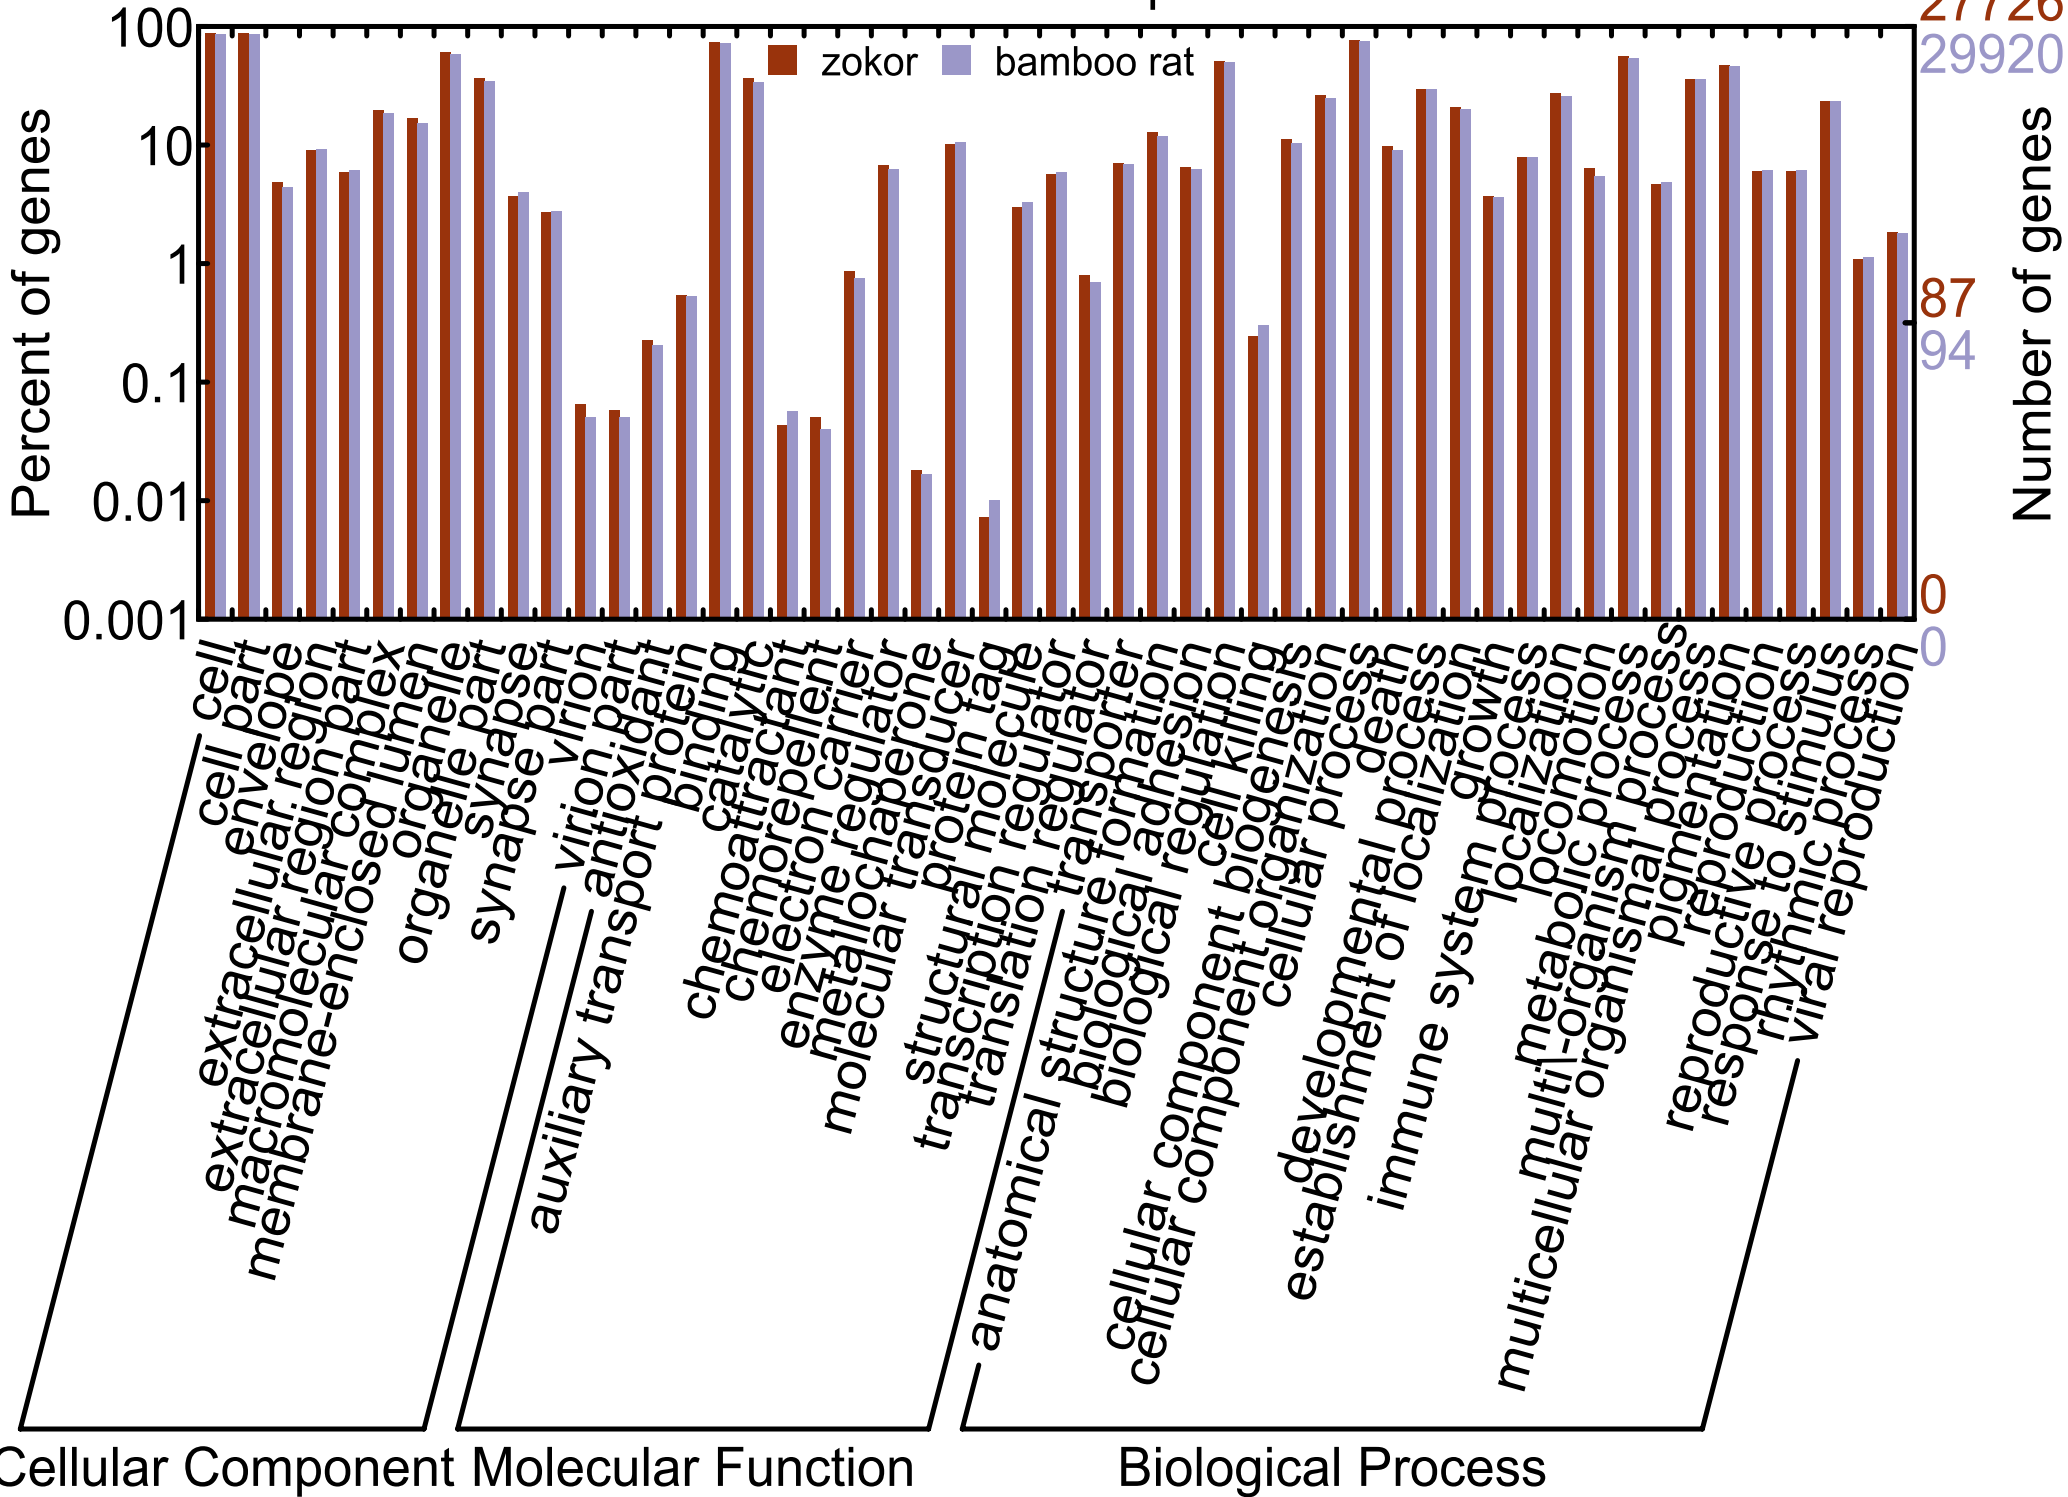

Supplement: 1471-2164-15-32-S2.pdf [file 1471-2164-15-32-S2.pdf]
