# Supplementary material for: Transcriptome sequencing and phylogenomic resolution within Spalacidae (Rodentia)
Source: PubMed Central journal article supplement (PMC3898070; doi:10.1186/1471-2164-15-32), 2014-01-17
Supplement: 1471-2164-15-32-S3.pdf [file 1471-2164-15-32-S3.pdf]

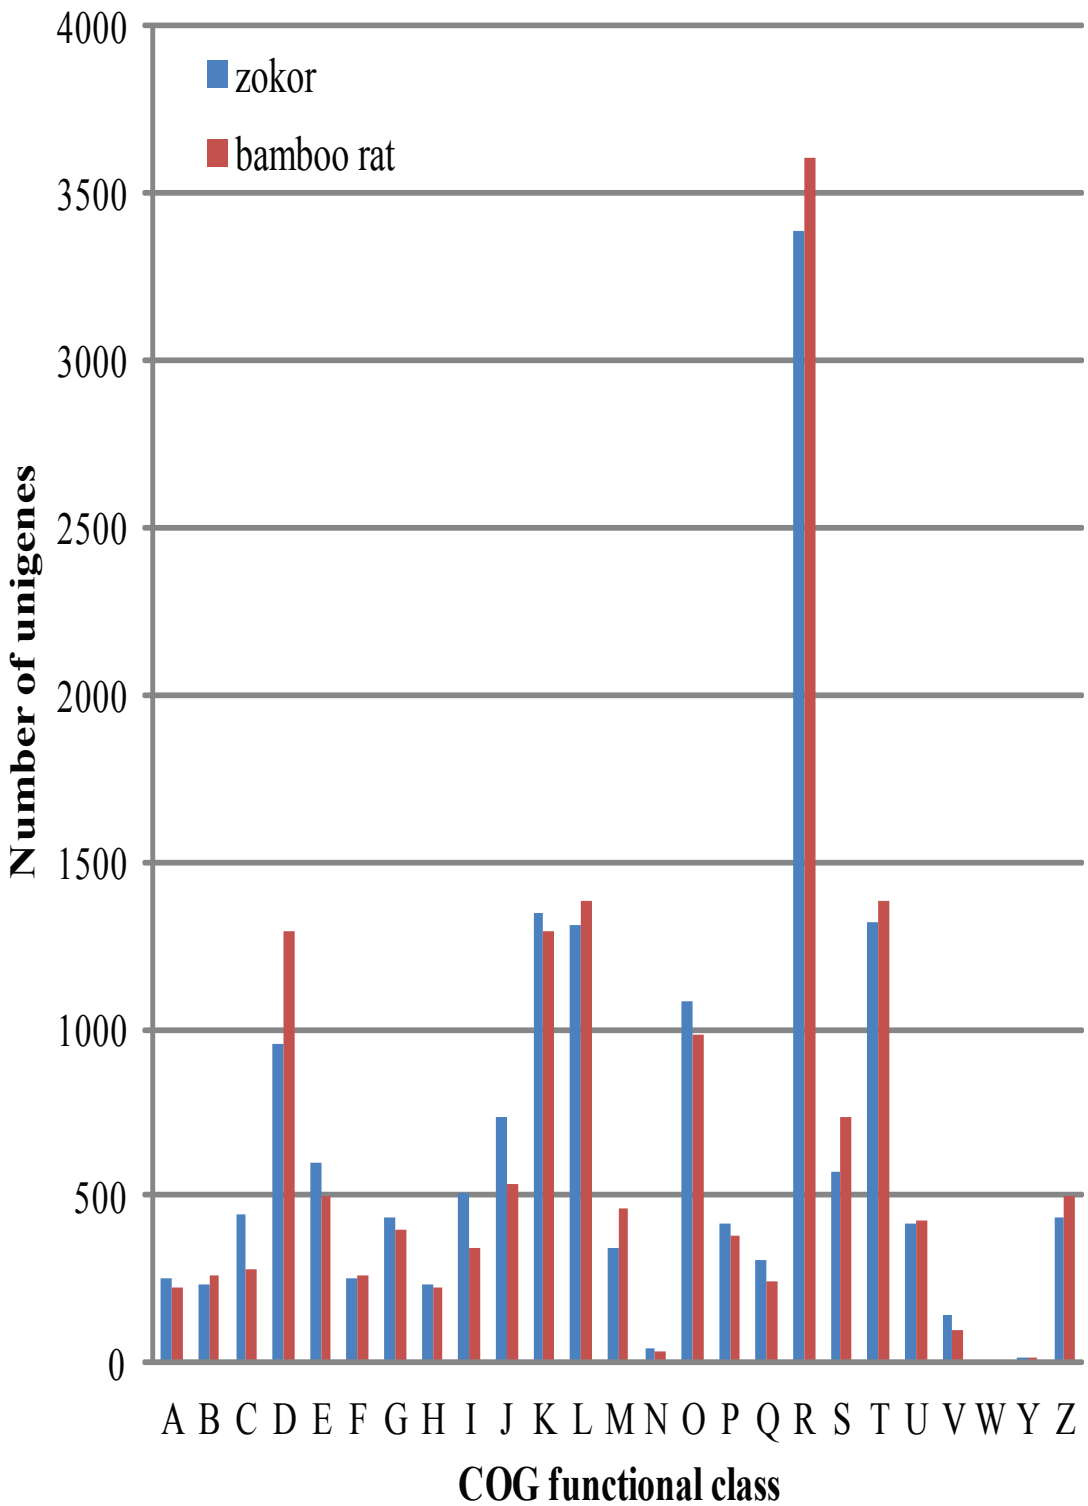

- A: RNA processing and modification
- B: Chromatin structure and dynamics
- C: Energy production and conversion
- D: Cell cycle control, cell division, chromosome partitioning
- E: Amino acid transport and metabolism
- F: Nucleotide transport and metabolism
- G: Carbohydrate transport and metabolism
- H: Coenzyme transport and metabolism
- I: Lipid transport and metabolism
- J: Translation, ribosomal structure and biogenesis
- K: Transcription
- L: Replication, recombination and repair
- M: Cell wall/membrane/envelope biogenesis
- N: Cell motility
- O: Posttranslational modification, protein turnover, chaperones
- P: Inorganic ion transport and metabolism
- Q: Secondary metabolites biosynthesis, transport and catabolism
- R: General function prediction only
- S: Function unknown
- T: Signal transduction mechanisms
- U: Intracellular trafficking, secretion, and vesicular transport
- V: Defense mechanisms
- W: Extracellular structures
- Y: Nuclear structure
- Z: Cytoskeleton
